# Supplementary material for: Tablet-based versus presentation-based seminars in radiology: Effects of student digital affinity and teacher charisma on didactic quality
Source: PubMed Central journal article supplement (PMC10594033; doi:10.3205/zma001641), 2023-09-15
Supplement: JME-40-59-s-001.pdf [file JME-40-59-s-001.pdf]

## Attachment 1: Learning objectives

|                                                                                                                    |
|--------------------------------------------------------------------------------------------------------------------|
| <b>Gynaecological imaging</b>                                                                                      |
| I can explain the technical implementation of conventional mammography.                                            |
| I can list the differential diagnoses of intramammary focal findings.                                              |
| I can apply the BIRADS and ACR classifications.                                                                    |
| I can evaluate alternative examination methods to mammography regarding their diagnostic strengths and weaknesses. |
|                                                                                                                    |
| <b>Paediatric imaging</b>                                                                                          |
| I can explain the radiological peculiarities of paediatric images compared to radiological images of adults.       |
| I can explain what typical paediatric pathologies look like in radiological imaging.                               |
| I can distinguish between "normal findings" and "abnormal findings" on paediatric images.                          |
| I can explain the ALARA principles.                                                                                |
|                                                                                                                    |
| <b>Imaging of the abdomen</b>                                                                                      |
| I can identify the anatomical structures of the abdomen on radiological images (including CT scans).               |
| I can explain what typical abdominal pathologies look like in radiological imaging.                                |
| I can assess the strengths and weaknesses of different imaging modalities.                                         |
| I can determine whether a radiological image of the abdomen represents a life-threatening acute pathology.         |
|                                                                                                                    |
| <b>Imaging of the heart and large vessels</b>                                                                      |
| I can identify the anatomical structures of the heart on radiological images.                                      |
| I can explain what typical pathologies of the heart and major vessels look like in radiological imaging.           |
| I can explain the advantages and disadvantages of cardio-CT and cardio-MRI.                                        |
| I can explain the technical basics of cardio-CT.                                                                   |
|                                                                                                                    |
| <b>Imaging of the thorax</b>                                                                                       |
| I can identify the anatomical structures in the chest X-ray.                                                       |
| I can explain what typical pathologies look like on chest X-ray.                                                   |
| I can independently evaluate a chest X-ray.                                                                        |
| I can explain the differences between a.p. and p.a. projections.                                                   |
|                                                                                                                    |
| <b>Imaging of the musculoskeletal system</b>                                                                       |
| I can identify the different spatial planes in sectional imaging (axial/sagittal/coronal).                         |
| I can explain what typical acute bone pathologies look like in radiological imaging.                               |
| I can distinguish between "normal findings" and "abnormal findings" on images of the musculoskeletal system.       |
| I can assess the need for surgical treatment based on diagnostic imaging.                                          |
