# Supplementary material for: Tablet-based versus presentation-based seminars in radiology: Effects of student digital affinity and teacher charisma on didactic quality
Source: PubMed Central journal article supplement (PMC10594033; doi:10.3205/zma001641), 2023-09-15
Supplement: JME-40-59-s-002.pdf [file JME-40-59-s-002.pdf]

## Attachment 2: Questionnaire

|     |                                                                                                                                      |
|-----|--------------------------------------------------------------------------------------------------------------------------------------|
| c1  | The teacher spoke in a dull voice.                                                                                                   |
| c2  | The teacher avoided eye contact with the students.                                                                                   |
| c3  | The teacher had a blunt face.                                                                                                        |
| c4  | The teacher integrated gestures congruent to his words.                                                                              |
| c5  | The teacher had a lively way of speaking.                                                                                            |
| c6  | The teacher communicated in a humorous fashion.                                                                                      |
| c7  | The teacher was open to the concerns of the students.                                                                                |
| c8  | The teacher responded adequately to the students' questions and suggestions.                                                         |
| c9  | The teacher ensured a positive working climate.                                                                                      |
| c10 | The teacher showed interest in my learning progress.                                                                                 |
| c11 | The teacher is an expert in his field.                                                                                               |
| c12 | I could imagine the teacher as a mentor.                                                                                             |
| q1  | The seminars are well organized.                                                                                                     |
| q2  | The seminars follow a clear structure.                                                                                               |
| q3  | The learning objectives are clearly defined and comprehensible.                                                                      |
| q4  | In the seminars, there is an open climate for personal contributions.                                                                |
| q5  | Following and thinking through the material/topic is encouraged.                                                                     |
| q6  | A connection between the basics of imaging and its use in clinical questions is established.                                         |
| q7  | The image materials used helped me a lot to work out the material.                                                                   |
| q8  | The variation of the learning activities (e.g. image analysis, interaction with fellow students, discussion etc.) is optimal for me. |
| q9  | I contributed orally to the seminars.                                                                                                |
| q10 | Digital media/images are integrated into the seminars sensibly.                                                                      |
| q11 | My knowledge is considerably greater after the seminars than before.                                                                 |
| q12 | I have learned something useful and important for medical practice.                                                                  |
| q13 | My understanding of radiology has developed through the seminars.                                                                    |
| q14 | My desire has grown to choose an imaging subject for my later continuing education.                                                  |
| d1  | I am technically interested.                                                                                                         |
| d2  | I am good at using smartphones.                                                                                                      |
| d3  | Social networks play an important role for me.                                                                                       |
| d4  | I enjoy reading in digital format.                                                                                                   |
